# Supplementary material for: Adipose Tissue-Derived Extracellular Vesicles Contribute to Phenotypic Plasticity of Prostate Cancer Cells
Source: MDPI journal article supplement (doi:10.3390/ijms24021229), 2023-01-08
Supplement: s1 [file s1]

## **Supplemental Tables**

| miRNA                   | Target Genes |        |         |         |          |          |          |        |
|-------------------------|--------------|--------|---------|---------|----------|----------|----------|--------|
| <b>hsa-let-7i-5p</b>    | AARSD1       | CASP3  | CSDE1   | GYS1    | MARS2    | PLEC     | SCYL1    | THBS1  |
|                         | ACP1         | CCND1  | CSNK1D  | HMGA1   | MED28    | PLOD2    | SEPTIN3  | TLR4   |
|                         | ADAMTS14     | CDC25A | DAD1    | HMGA2   | MLLT1    | POLD2    | SIGMAR1  | TPM2   |
|                         | ADAMTS15     | CDIPT  | DHX57   | HMOX1   | MRM1     | POLR2C   | SLC1A4   | TRIM71 |
|                         | ADAMTS2      | CDK6   | DICER1  | HYOU1   | MRPS24   | POM121   | SLC25A1  | TRMT1  |
|                         | ADGRG1       | CDKAL1 | DOCK5   | IFIT5   | MRPS33   | PPP1R7   | SLC25A13 | TTC9C  |
|                         | AGO4         | CEMIP2 | DRD3    | IFRD1   | MTPN     | PRDM1    | SLC25A24 | TUSC2  |
|                         | AKAP8        | CHMP2A | DSP     | IGF2BP1 | MTRR     | PRIM1    | SLC25A32 | TYMS   |
|                         | ANAPC1       | CIAO2A | DUSP12  | IGF2BP2 | MYC      | PRRC2A   | SLC38A1  | UGT8   |
|                         | ATAD3B       | COIL   | DUSP23  | IGF2BP3 | NEDD4    | PTGS2    | SMC1A    | UHRF1  |
|                         | ATP6V0A1     | COL1A1 | EIF3J   | IPO4    | NF2      | PXDN     | SMOX     | VCAN   |
|                         | ATP6V1F      | COL1A2 | EIF4G2  | ITGB3   | NID1     | RABGAP1L | SNAP23   | VIM    |
|                         | AURKB        | COL4A1 | F2      | KCNJ16  | NID2     | RAS      | SPARC    | VPS39  |
|                         | BCL2L1       | COL4A2 | FADS2   | KLK10   | NRAS     | RBM19    | SPCS3    | WNT1   |
|                         | BCL7A        | COL4A5 | FANCD2  | KRAS    | NXN      | RDH10    | SPRYD4   |        |
|                         | BMP2K        | COL5A1 | FNDC3A  | KRT19   | OTULINL  | RHOB     | SYPL1    |        |
|                         | BSG          | COL5A2 | GAK     | LAMC1   | P3H1     | RHOG     | TAF9B    |        |
|                         | CALCOCO2     | COL8A1 | GEMIN7  | LIN28A  | PDGFA    | RPP38    | TAGLN    |        |
|                         | CAPG         | COMMD9 | GRPEL2  | LOXL2   | PDGFB    | RRP8     | TGFBR1   |        |
|                         | CARHSP1      | CRTAP  | GTPBP3  | LOXL4   | PGRMC1   | RTCA     | TGFBR2   |        |
| <b>hsa-miR-126-3p</b>   | CRKL         | IRS1   | PIK3R2  | SLC45A3 | SPRED1   | TOM1     | VCAM1    | VEGFA  |
| <b>hsa-miR-21-5p</b>    | ACTA2        | CDK6   | GLCC1   | MTAP    | PTEN     | SLC16A10 | TAGLN    |        |
|                         | APAF1        | CDKN1A | HIPK3   | NFIB    | RECK     | SOD3     | TCF21    |        |
|                         | BMPR2        | CFL2   | IL6R    | PDCD4   | RP2      | SOD3     | TGFBR2   |        |
|                         | BTG2         | FAM3C  | JAG1    | PELI1   | SERPINB5 | SOX5     | TIMP3    |        |
|                         | SGK3/SGK3    | FAS    | LRRFIP1 | PIK3R1  | SESN1    | SPRY1    | TNF      |        |
| <b>hsa-miR-23a-3p</b>   | CDC25A       | FASLG  | MARCKS  | PRRG4   | SLC12A1  | SPRY2    | TPM1     |        |
|                         | ATAT1        | GATD3A | IL6R    | MET     | POU4F2   | SMAD3    | TNFAIP3  |        |
|                         | CXCL12       | HES1   | LMNB1   | NOTCH1  | PTEN     | SMAD4    | TRIM63   |        |
| <b>hsa-miR-302d-3p</b>  | FBXO32       | HOXA11 | MDH2    | PLAU    | SEPTIN3  | SMAD5    | TRPS1    |        |
|                         | ADAM9        | CD83   | FAM13B  | KLHL12  | MKRN1    | PRKACB   | TBC1D2   | USP12  |
|                         | ANKRD13B     | CDK11B | FITM2   | KPNA2   | MYBL1    | AS1      | TEX30    | VEGFA  |
|                         | ANKRD52      | CDK19  | FYCO1   | LATS2   | NIN      | RAB22A   | TFAP4    | VPS26A |
|                         | APP          | CDKN1A | GBP3    | LEFTY1  | NIPSNAP2 | RECK     | TMEM14A  | ZHX1   |
|                         | ARHGEF3      | CENPF  | GLTP    | LEFTY2  | NR4A2    | RELA     | TMEM263  | ZNF226 |
|                         | BAZ1A        | CFL2   | GPSM2   | LMNB1   | NUP58    | RNF149   | TMEM9B   |        |
|                         | C9orf78      | CMTM4  | HERPUD1 | LUC7L2  | PACRGL   | RPIA     | TNFAIP1  |        |
|                         | CCND1        | CNOT6  | HSPA14  | MARCHF4 | PBK      | SEPTIN2  | TP63     |        |
|                         | CCND2        | CYB5R4 | INSIG2  | MBNL2   | PCGF5    | SLC25A23 | TRPS1    |        |
|                         | CD24         | DKK1   | KDM1B   | MED28   | PDIK1L   | SLC35F6  | TTC8     |        |
|                         | CD44         | ERBB4  | KIF23   | MFSD4B  | PHC2     | STK4     | TUSC2    |        |
|                         | CD46         | ESR1   | KLF13   | MICA    | PRC1     | STX11    | UBXN1    |        |
| <b>hsa-miR-378e</b>     | CASP9        | IGF1R  | ODC1    | PDPK1   | SUFU     | TUSC2    |          |        |
| <b>hsa-miR-411-5p</b>   | SPRY4        | TXNIP  |         |         |          |          |          |        |
| <b>hsa-miR-451a</b>     | ABCB1        | AKTIP  | FBXO33  | MIF     |          |          |          |        |
| <b>hsa-miR-548ar-5p</b> | ERBB2        | MTA1   |         |         |          |          |          |        |
| <b>hsa-miR-612</b>      | AKT2         | TP53   |         |         |          |          |          |        |

**Supplemental Table S1: Target genes of HAMVEC EV miRNAs.** The Ingenuity pathway analysis miRNA target filter tool was used to identify 318 experimentally validated target genes of the miRNA detected in both EV C and EV PIC

| miRNA          | Target Genes |          |          |         |        |        |         |           |
|----------------|--------------|----------|----------|---------|--------|--------|---------|-----------|
| hsa-miR-155-5p | ABHD16A      | CCN1     | DNAJC19  | JARID2  | MYO10  | PRAF2  | SDCBP   | TNFRSF10A |
|                | AGTR1        | CCND1    | DPP7     | LCLAT1  | MYO1E  | PRKCI  | SH3BP4  | TP53INP1  |
|                | AICDA        | CD47     | DSG2     | LDOC1   | NARS1  | PTPRJ  | SLA     | TRAM1     |
|                | AMIGO2       | CDK5RAP3 | ETS1     | LPL     | NT5E   | RAB23  | SLC30A1 | TRIM32    |
|                | ANKFY1       | CEBPB    | F2       | LY6K    | PDE3A  | RAB27B | SMAD1   | TRIP13    |
|                | ARFIP1       | CHAF1A   | FADD     | MAF     | PDLIM5 | RAB34  | SMAD2   | TXNDC12   |
|                | ARFIP2       | CLDN1    | FADS1    | MATR3   | PHC2   | RAB5C  | SNAP29  | TXNRD1    |
|                | ARID2        | CSF1R    | FAR1     | MEIS1   | PICALM | RAB6A  | SOCS1   |           |
|                | ARL10        | CTLA4    | FGF7     | MET     | PKN2   | RAI14  | SPI1    | UFL1      |
|                | ARL5B        | CTNNB1   | FMNL2    | METTL7A | PLXND1 | RCN2   | SYNE2   | VAMP3     |
|                | ATG3         | CUL4B    | GNA13    | MOSPD2  | PMAIP1 | RCOR1  | SYPL1   | WDFY1     |
|                | ATP6V1C1     | CUX1     | HSD17B12 | MPZL1   | PODXL  | RHEB   | TAB2    | WEE1      |
|                | BACH1        | CYP51A1  | HSDL1    | MSI2    | POLE3  | RHOA   | TACSTD2 |           |
|                | BET1         | DCAF7    | IKBKE    | MTARC1  | POLE4  | RIPK1  | TBCA    |           |
|                | BRPF3        | DHX40    | IL13RA1  | MYB     | PPL    | SATB1  | TCF4    |           |
|                | CBFB         | DNAJB1   | INPP5D   | MYD88   | PPP5C  | SCAMP1 | TM6SF1  |           |

**Supplemental Table S2: Target genes of miRNA found in HAMVEC EV PIC but not EV C.**

The Ingenuity pathway analysis miRNA target filter tool was used to identify experimentally validated target genes of the miRNA detected in only EV PIC. Only one miRNA detected in EV PIC alone (miR-155) was found to have experimentally validated target genes.

| miRNA      | Target Gene |         |         |          |          |          |         |
|------------|-------------|---------|---------|----------|----------|----------|---------|
| miR-16-5p  | ABCF2       | CDC14B  | GALNT7  | ITGA2    | NPR3     | RAB9B    | TMEM109 |
|            | ABHD10      | CDC25A  | GFM1    | JUN      | NT5DC1   | RAD51C   | TMEM251 |
|            | ACP2        | CDK5RAP | GFPT1   | KCNN4    | OGT      | RAF1     | TMEM43  |
|            | ACTR1A      | CDK6    | GNL3L   | KIF23    | OMA1     | RARS1    | TNFSF9  |
|            | ADSS2       | CENPJ   | GOLGA5  | KITLG    | OSGEPL1  | RECK     | TOMM34  |
|            | ALDH1A3     | CEP63   | GOLPH3L | KPNA3    | PABIR3   | RFT1     | TPI1    |
|            | ANAPC16     | CFL2    | GPAM    | LAMC1    | PAFAH1B2 | RHOT1    | TPM3    |
|            | ANLN        | CHEK1   | GRB10   | LAMTOR3  | PANX1    | RIDA     | TPPP3   |
|            | ARHGDIA     | CHORDC1 | GRB2    | LAMTOR5  | PDCD4    | RNASEL   | TRMT13  |
|            | ARL2        | CLDN12  | GSTM4   | LDHA     | PDCD6IP  | RNF144B  | TXN2    |
|            | ASXL2       | CREBL2  | GTF2H1  | LINC0066 | PEDS1    | RTN4     | UBE2S   |
|            | ATF6        | CRHBP   | H3-3    | LUZP1    | PHKB     | SEC24A   | UBE4A   |
|            | ATG9A       | CSHL1   | HACE1   | LYPLA2   | PHLDB2   | SERPINE2 | UCP2    |
|            | BCL2        | DIPK1A  | HARS1   | MAP2K1   | PISD     | SHOC2    | UGDH    |
|            | BCL2L2      | DMTF1   | HDHD2   | MAP2K4   | PLAG1    | SKAP2    | UGP2    |
|            | BDNF        | DNAJB4  | HERC6   | MAPK3    | PLK1     | SLC12A2  | UTP15   |
|            | BMI1        | DTD1    | HMGA1   | MCL1     | PMS1     | SLC16A3  | VEGFA   |
|            | C17orf80    | E2F3    | HMOX1   | MGAT4A   | PNN      | SLC25A22 | VPS45   |
|            | C2orf74     | ECHDC1  | HPF1    | mir-9    | PNP      | SLC35A1  | VT11B   |
|            | CA12        | EGFR    | HSDL2   | MLLT1    | PPIF     | SLC35B3  | WEE1    |
|            | CACNA2D1    | EGLN2   | HSP90B1 | MLLT11   | PPP2R5C  | SLC38A1  | WIPF1   |
|            | CADM1       | EIF4E   | HSPA1   | MRPL20   | PRIM1    | SLC38A5  | WNT3A   |
|            | CAPRIN1     | F2      | HYAL3   | MSH2     | PRIMPOL  | SLC7A1   | WT1     |
|            | CARD8       | FGF2    | IFNG    | MYB      | PSAT1    | SPI1     | YIF1B   |
|            | CCND1       | FGF7    | IFRD1   | NAA15    | PTGS2    | SPTLC1   | ZNF559  |
|            | CCND3       | FGFR1   | IGF1    | NAPG     | PURA     | SQSTM1   | ZNF622  |
|            | CCNE1       | FLT3    | IGF1R   | NFIA     | PWWP2A   | SRPRA    | ZYX     |
|            | CCNF        | FNDC3B  | IGF2R   | NIPAL2   | RAB21    | SRPRB    |         |
|            | CDC14A      | GALNT13 | IPO4    | NOTCH2   | RAB30    | TIA1     |         |
| let-7b-5p  | AARSD1      | CDKAL1  | Dst     | IGF2BP3  | NID2     | RHOB     | TGFBR1  |
|            | ACP1        | CEMIP2  | DUSP12  | IPO4     | NRAS     | RHOG     | TGFBR2  |
|            | ADAMTS14    | CHMP2A  | DUSP23  | ITGB3    | NXN      | RPP38    | THBS1   |
|            | ADAMTS15    | CIAO2A  | EIF3J   | KCNJ16   | OTULINL  | RRP8     | TLR4    |
|            | ADAMTS2     | COIL    | EIF4G2  | KLK10    | P3H1     | RTCA     | Tpm1    |
|            | ADGRG1      | COL1A1  | F2      | KRAS     | PDGFA    | SCYL1    | TPM2    |
|            | AGO4        | COL1A2  | FADS2   | KRT19    | PDGFB    | SEPTIN3  | TRIM71  |
|            | AKAP8       | COL4A1  | FANCD2  | LAMC1    | PGRMC1   | SIGMAR1  | TRMT1   |
|            | ANAPC1      | COL4A2  | FNDC3A  | LIN28A   | PLEC     | SLC1A4   | TTC9C   |
|            | ATAD3B      | COL4A5  | GAK     | LOXL2    | PLOD2    | SLC25A1  | TUSC2   |
|            | ATP6V0A1    | COL5A1  | GEMIN7  | LOXL4    | POLD2    | SLC25A13 | TYMS    |
|            | ATP6V1F     | COL5A2  | GRPEL2  | MARS2    | POLR2C   | SLC25A24 | UGT8    |
|            | AURKB       | COL8A1  | GTPBP3  | MED28    | POM121   | SLC25A32 | UHRF1   |
|            | BCL2L1      | COMMD9  | GYS1    | MLLT1    | PPP1R7   | SLC38A1  | VCAN    |
|            | BCL7A       | CRTAP   | HMGA1   | MRM1     | PRDM1    | SMC1A    | VIM     |
|            | BMP2K       | CSDE1   | Hmga2   | MRPS24   | PRIM1    | SMOX     | VPS39   |
|            | BSG         | CSNK1D  | HMGA2   | MRPS33   | PRRC2A   | SNAP23   | WNT1    |
|            | CALCOCO2    | DAD1    | HMOX1   | MTPN     | PTGS2    | SPARC    |         |
|            | CAPG        | DHX57   | HYOU1   | MTRR     | PXDN     | SPCS3    |         |
|            | CCND1       | DICER1  | IFIT5   | MYC      | RABGAP1L | SPRYD4   |         |
|            | CDC25A      | DOCK5   | IFRD1   | NEDD4    | RAS      | SYPL1    |         |
|            | CDIPT       | DRD3    | IGF2BP1 | NF2      | RBM19    | TAF9B    |         |
|            | CDK6        | DSP     | IGF2BP2 | NID1     | RDH10    | TAGLN    |         |
| miR-30c-5p | CARHSP1     | COL4A1  | IDH1    | MYO10    | PLEC     | SLC38A2  | TMED7   |

|                    |          |          |         |          |          |           |           |
|--------------------|----------|----------|---------|----------|----------|-----------|-----------|
|                    | CASP3    | COL4A2   | IFRD1   | NAPG     | PLOD2    | SLC4A10   | TMEM41B   |
|                    | ADAMTS15 | COL4A5   | ITGA2   | NCEH1    | PNP      | SLC4A7    | TMEM59    |
|                    | ADAMTS2  | COL5A1   | JUN     | NCL      | POGLUT3  | SLC7A1    | TMEM87A   |
|                    | ADPGK    | COL5A2   | KRT7    | NEUROD1  | PPP3CA   | SLC7A11   | TNFAIP2   |
|                    | ANPEP    | COL8A1   | KRT85   | NID1     | PPP3R1   | SLC9A3R2  | TNFRSF10B |
|                    | AP2A1    | CPNE8    | LAMC1   | NID2     | PRPF40A  | SPARC     | TNRC6A    |
|                    | ATP2A2   | CRTAP    | LMNB2   | NPR3     | PTGFRN   | STRN      | TP53      |
|                    | ATRX     | DOCK7    | LOXL2   | NT5C3A   | PTPA     | STX1A     | Tpm1      |
|                    | BCL6     | DST      | LOXL4   | NT5E     | PTPRK    | STX7      | TRPS1     |
|                    | BECN1    | ELMOD2   | LRRRC8C | NUCB1    | PTRH1    | SYPL1     | UAP1      |
|                    | CBFB     | F2       | LTN1    | NUFIP2   | RAB27B   | SYT4      | UBE2I     |
|                    | CCN2     | FRG1     | MAP4K4  | P3H1     | RAD23B   | TGFBR1    | VCAN      |
|                    | CDCP1    | FXR2     | MAT2A   | P4HA2    | RBMS1    | TGFBR2    | WNT5A     |
|                    | CEP72    | GALNT1   | MBNL1   | PAFAH    | RUNX2    | THEM4     |           |
|                    | CHD1     | GALNT7   | MET     | PDGFA    | SEC23A   | TMCO1     |           |
|                    | CNOT9    | GNAI2    | MLLT1   | PDGFB    | SEC62    | TMED10    |           |
|                    | COL1A1   | GPD2     | MLLT11  | PEX11B   | SLC12A4  | TMED2     |           |
|                    | COL1A2   | HNRNPM   | MPDU1   | PGM1     | SLC38A1  | TMED3     |           |
| <b>miR-125b-5p</b> | ABTB1    | BMF      | CEBPG   | GSS      | KRT19    | PPT2      | TP53      |
|                    | ACSS1    | BMPR1B   | CYP1A1  | H3A/B    | LIN28A   | RABL6     | TSPAN8    |
|                    | ADAMTS1  | CASP6    | DDX19B  | H4C1     | LIPA     | RBM8A     | UBE2I     |
|                    | AJUBA    | CASP7    | DICER1  | HK2      | MAN1A1   | RHEBL1    | UGT2B15   |
|                    | ALOX5    | CBFB     | DIO3    | ID1      | MAP2K7   | SCD       | UGT2B17   |
|                    | ANAPC16  | CBLN2    | DUS1L   | ID2      | MAZ      | SGPL1     | UGT2B28   |
|                    | APLN     | CBX7     | E2F3    | ID3      | MYD88    | SH3BP4    | UVRAG     |
|                    | ARID3A   | CCR5     | ELAVL1  | IGFBP3   | OSBPL9   | SMO       | VSIR      |
|                    | ARID3B   | CDC25A   | ENTPD4  | IKZF4    | PCDHB10  | ST18      | ZNF385A   |
|                    | ATP6AP1L | CDH5     | ERBB2   | IL1RN    | PCTP     | TAF1A     |           |
|                    | B3GALT4  | CDK6     | ERBB3   | JARID2   | PERP     | TENM2     |           |
|                    | BAK1     | CDKN2A   | GPR160  | KLF13    | PIGR     | TOR2A     |           |
| <b>miR-29b-3p</b>  | ACVR2A   | COL1A1   | DNMT3A  | HMG3     | NAV3     | PURA      | TGFBR2    |
|                    | ADAMTS14 | COL1A2   | DNMT3B  | INSIG1   | NID1     | RERE      | TNFAIP3   |
|                    | ADAMTS15 | COL3A1   | DST     | KCTD3    | NID2     | SHROOM2   | Tpm1      |
|                    | ADAMTS2  | COL4A1   | DUSP2   | KLF4     | P3H1     | SP1       | TRIM9     |
|                    | ARPC3    | COL4A2   | EOMES   | LAMC1    | PDGFA    | SPARC     | TUBB2A    |
|                    | BACE1    | COL4A5   | FAM3C   | LOXL2    | PDGFB    | SRSF10    | VCAN      |
|                    | CAV2     | COL5A1   | FBN1    | LOXL4    | PIK3R1   | TBX21     | YY1       |
|                    | CD276    | COL5A2   | FRAT2   | MAPRE2   | PLEC     | TCL1A     | ZFP36L1   |
|                    | CDC42    | COL5A3   | GAS7    | MCL1     | PLOD2    | TDG       |           |
|                    | CDK6     | COL8A1   | GMFB    | MLF1     | PPIC     | TET1      |           |
|                    | CNOT8    | CRTAP    | GPR37   | MYBL2    | PPM1D    | TGFB3     |           |
|                    | COL15A1  | DCP2     | HDAC4   | NASP     | PTEN     | TGFBR1    |           |
| <b>miR-122-5p</b>  | AACS     | ATP1A2   | CS      | FUNDC2   | MEP1A    | RAB11FIP1 | TMEM50B   |
|                    | ADAM17   | BACH2    | DSTYK   | G6PC3    | NCAM1    | RAB6B     | TPD52L2   |
|                    | AKT3     | BCKDK    | DUSP2   | GALNT10  | NDRG3    | RABIF     | TRIB1     |
|                    | ALDOA    | BCL2L2   | EGLN3   | GPX7     | NFATC1   | SLC35A4   | TRPV6     |
|                    | ANK2     | CCNG1    | ENTPD4  | GYS1     | NFATC2IP | SLC7A1    | TTYH3     |
|                    | ANXA11   | CD320    | FAM117B | HJV      | NUMBL    | SLC7A11   | UBAP2     |
|                    | AP3M2    | CERS6    | FOXJ3   | MAPK11   | OSMR     | TBX19     | XPO6      |
|                    | ATP11A   | CLDN18   | FOXP1   | MECP2    | PALM     | TMED3     |           |
| <b>miR-145-5p</b>  | ACBD3    | CLINT1   | FLI1    | LINC0033 | MYO5A    | RTKN      | USP46     |
|                    | AHNAK    | DDR1     | FSCN1   | MAPK7    | NDUFA4   | SOX9      | VASN      |
|                    | C11orf58 | DFFA     | IGF1R   | MDFI     | PADI1    | SPTB      |           |
|                    | CBFB     | DTD1     | IRS1    | MDM2     | PARP8    | SWAP70    |           |
|                    | CCDC25   | EIF4E    | KLF4    | MITF     | PPP3CA   | TPM3      |           |
|                    | CCNA2    | EIF4EBP2 | KLF5    | MMP1     | RAB27A   | TYR       |           |
|                    | CDK4     | F11R     | KRT7    | MUC1     | RASA1    | TYRP1     |           |
|                    | CES1     | FBXO28   | LAMP2   | MYC      | ROBO4    | UNG       |           |
| <b>miR-93-5p</b>   | APP      | BNIP2    | E2F1    | ITCH     | NCOA3    | RBL2      | TNF       |

|             |         |          |           |          |          |          |         |
|-------------|---------|----------|-----------|----------|----------|----------|---------|
|             | ARID4B  | CAMTA1   | E2F2      | JAK1     | PAK5     | RUNX1    | TP63    |
|             | BAMBI   | CCND1    | E2F3      | MAP3K12  | PKD2     | S1PR1    | TUSC2   |
|             | BCL2    | CDKN1A   | EGR2      | MEF2D    | PPARG    | STAT3    | VEGFA   |
|             | BCL2L11 | CREB1    | ESR1      | MICA     | PTEN     | TBC1D2   | VIM     |
|             | BLACAT1 | CRIM1    | HBP1      | MMP3     | PURA     | TGFBR2   | ZBTB7A  |
|             | BMPR2   | CXCL8    | HIPK3     | MYLIP    | RB1      | TLR7     |         |
| miR-21-5p   | ACTA2   | CDK6     | GLCC1     | MTAP     | PTEN     | SLC16A10 | TAGLN   |
|             | APAF1   | CDKN1A   | HIPK3     | NFIB     | RECK     | SOCS5    | TCF21   |
|             | BMPR2   | CFL2     | IL6R      | PDCD4    | RP2      | SOD3     | TGFBR2  |
|             | BTG2    | FAM3C    | JAG1      | PELI1    | SERPINB5 | SOX5     | TIMP3   |
|             | SGK3    | FAS      | LRRFIP1   | PIK3R1   | SESN1    | SPRY1    | TNF     |
|             | CDC25A  | FASLG    | MARCKS    | PRRG4    | SLC12A1  | SPRY2    | TPM1    |
| miR-23a-3p  | ATAT1   | GATD3A/B | IL6R      | MET      | POU4F2   | SMAD3    | TNFAIP3 |
|             | CXCL12  | HES1     | LMNB1     | NOTCH1   | PTEN     | SMAD4    | TRIM63  |
|             | FBXO32  | HOXA11   | MDH2      | PLAU     | SEPTIN3  | SMAD5    | TRPS1   |
| miR-25-3p   | BCL2L11 | CDKN1A   | FBXW7     | ITGA5    | MAPRE1   | OSBPL8   | RFFL    |
|             | BMPR2   | CDKN1C   | HIPK3     | ITGB3    | MYLIP    | PCGF1    | VSNL1   |
|             | CCNE2   | ENPP6    | IKZF1     | MAP2K4   | OSBPL2   | PTEN     | ZEB2    |
| miR-181a-5p | AICDA   | CDKN1B   | GATA6     | KRAS     | NOTCH4   | TIMP3    |         |
|             | BCL2    | CDX2     | GRIA2     | MMP14    | PLAG1    | TRA      |         |
|             | CD69    | ESR1     | HOXA11    | NLK      | TCL1A    | VSNL1    |         |
| miR-26b-5p  | BAK1    | EPHA2    | HPGD      | MAP2     | PLAG1    | PTGS2    | SMAD1   |
|             | CHORDC1 | EZH2     | HTR1A     | PHF6     | PTEN     | RB1      | TGFBR2  |
| miR-129-5p  | AGO3    | CAMTA1   | ETV6      | GALNT1   | PDS5A    | TNPO1    | ZFP91   |
|             | BMPR2   | DNMT3A   | FNDC3B    | HIF1A-   | SOX4     | TP53INP1 |         |
| miR-223-3p  | CNTN4   | LMO2     | NFIA      | SCN3A    | STMN1    |          |         |
|             | IRS1    | MEF2C    | RHOB      | STAT3    | VIM      |          |         |
| miR-150-5p  | AICDA   | BACH1    | CSF1R     | MALAT1   | PDGFB    |          |         |
|             | Akt     | CEBPB    | EGR2      | MYB      | VEGFA    |          |         |
| miR-199b-5p | ALOX5AP | ETS1     | LAMC2     | PDCD4    | SIRT1    |          |         |
|             | DYRK1A  | HIF1A    | MYH9      | SET      | SNHG29   |          |         |
| miR-130a-3p | ATG2B   | DICER1   | MAFB      | SMAD4    | ZFPM2    |          |         |
|             | CSF1    | HOXA5    | MEOX2     | TAC1     |          |          |         |
| miR-10a-5p  | APAF1   | HOXD10   | LINC00324 | PTEN     |          |          |         |
|             | HOXA1   | KLF4     | NF1       | USF2     |          |          |         |
| miR-126-3p  | CRKL    | PIK3R2   | SPRED1    | VCAM1    |          |          |         |
|             | IRS1    | SLC45A3  | TOM1      | VEGFA    |          |          |         |
| miR-99a-5p  | EPDR1   | FGFR3    | MTOR      | RPTOR    |          |          |         |
|             | FGF16   | IGF1R    | PLK1      | SMARCA5  |          |          |         |
| miR-214-3p  | ATF4    | GPD1     | LINC00324 | PTEN     |          |          |         |
|             | FGF16   | ING4     | POU4F2    | SCN3A    |          |          |         |
| miR-148a-3p | CCKBR   | DNMT3B   | HOTAIR    | RPS6KA5  |          |          |         |
|             | DNMT1   | DUSP1    | NR1I2     | Tnxa-ps1 |          |          |         |
| miR-142-3p  | ADCY9   | BCL2L1   | BCLAF1    | C9orf72  | LIFR     | PRKCA    | TARDBP  |
| miR-494-3p  | FGF16   | HMOX1    | KIT       | PTEN     | SCN3A    | VSNL1    |         |
| miR-22-3p   | BMP7    | ESR1     | MAX       | PPARA    | SRF      |          |         |
| miR-191-5p  | Ccl9    | CRP      | IL6       | TLR3     |          |          |         |
| miR-451a    | ABCB1   | AKTIP    | FBXO33    | MIF      |          |          |         |
| miR-612     | AKT2    | TP53     |           |          |          |          |         |
| miR-411-5p  | SPRY4   | TXNIP    |           |          |          |          |         |
| miR-144-3p  | ENPP6   |          |           |          |          |          |         |
| miR-145-5p  | ABRACL  |          |           |          |          |          |         |
| miR-574-3p  | TP63    |          |           |          |          |          |         |
| miR-342-3p  | MTDH    |          |           |          |          |          |         |

**Supplemental Table S3: Target genes of miRNA detected in SC and OM ATEV.** The Ingenuity pathway analysis miRNA target filter tool was used to identify experimentally validated target genes of the miRNA detected in miRNA detected in SC and OM ATEV.
