# Supplementary material for: Adipose Tissue-Derived Extracellular Vesicles Contribute to Phenotypic Plasticity of Prostate Cancer Cells
Source: MDPI journal article supplement (doi:10.3390/ijms24021229), 2023-01-08
Supplement: s1 [file s1]

## Supplemental Figure S1

**A.**

DiD labeled EV

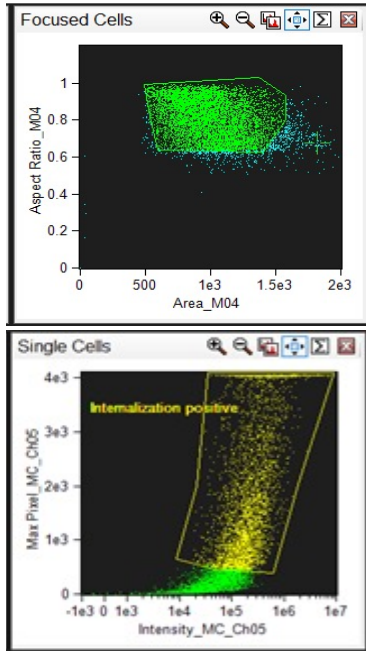

Dye Control

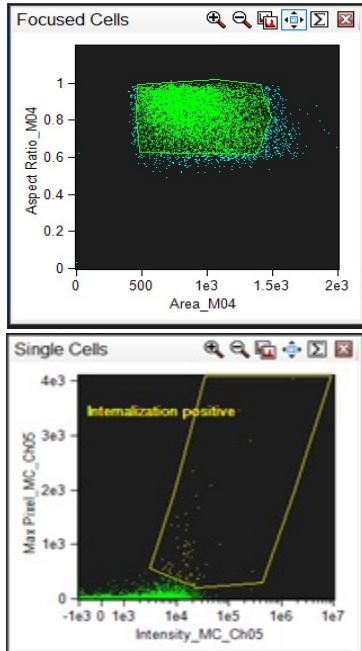

**B.**

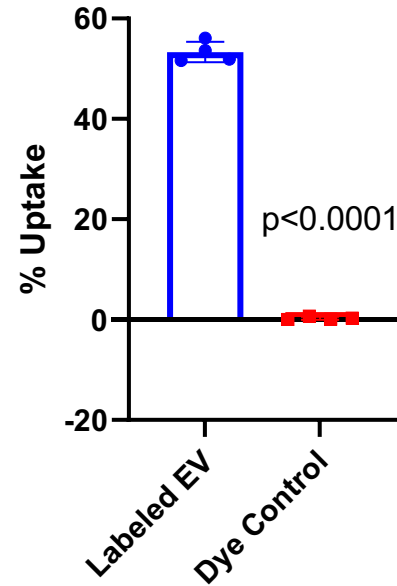

**C.**

**Percent Colocalization**

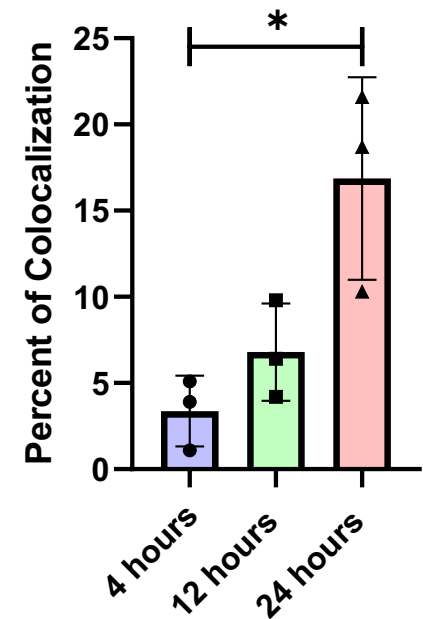

**Supplemental Figure S1: EV labeling and colocalization.** **A and B:** EV uptake and cell cycle phase were assessed using Amnis ImageStream. Double ultracentrifugation eliminated nearly all DiD aggregate background fluorescence as shown by flow cytometry gating and quantification of uptake in PC3ML incubated with labeled EVs and a dye (DiD) only negative control. **C:** Colocalization analysis revealed that after 12 hours incubation, less than 10% EV appear in the lysosome.

## Supplemental Figure S2

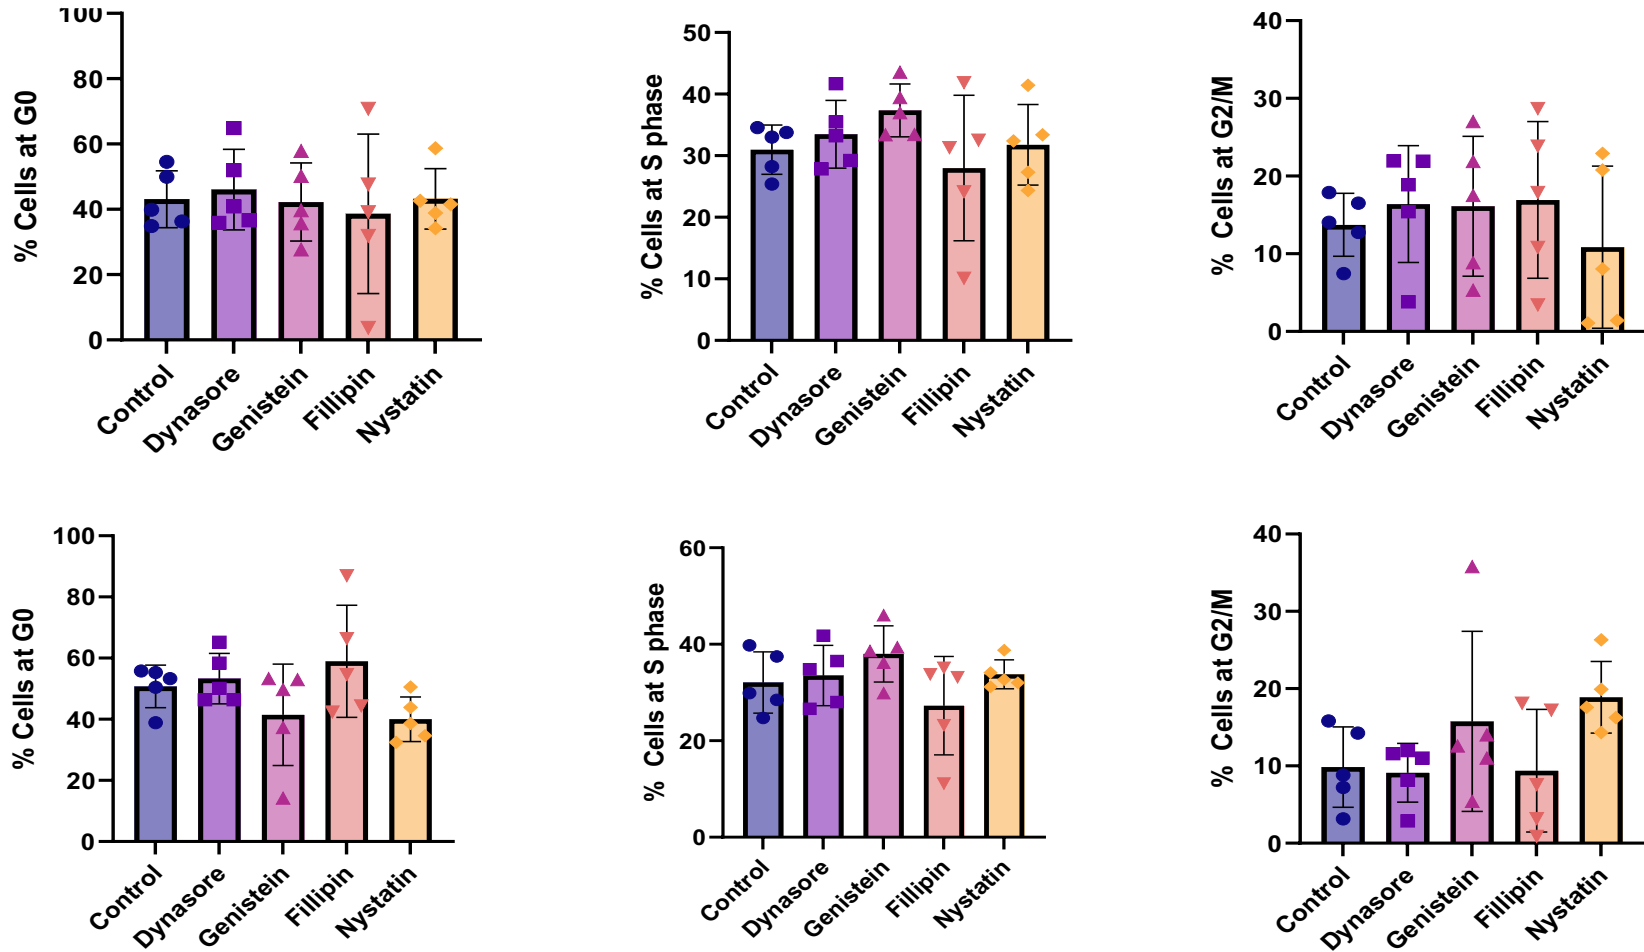

**Supplemental Figure S2: Effect of Endocytosis inhibitors on cell cycle phase distribution.** PC3ML were incubated with endocytosis inhibitors Dynasore, Genistein, Fillipin, or Nystatin during EV treatment. Treatment with endocytosis inhibitors did not change the relative proportion of cells at each phase of cell cycle.

## Supplemental Figure S3

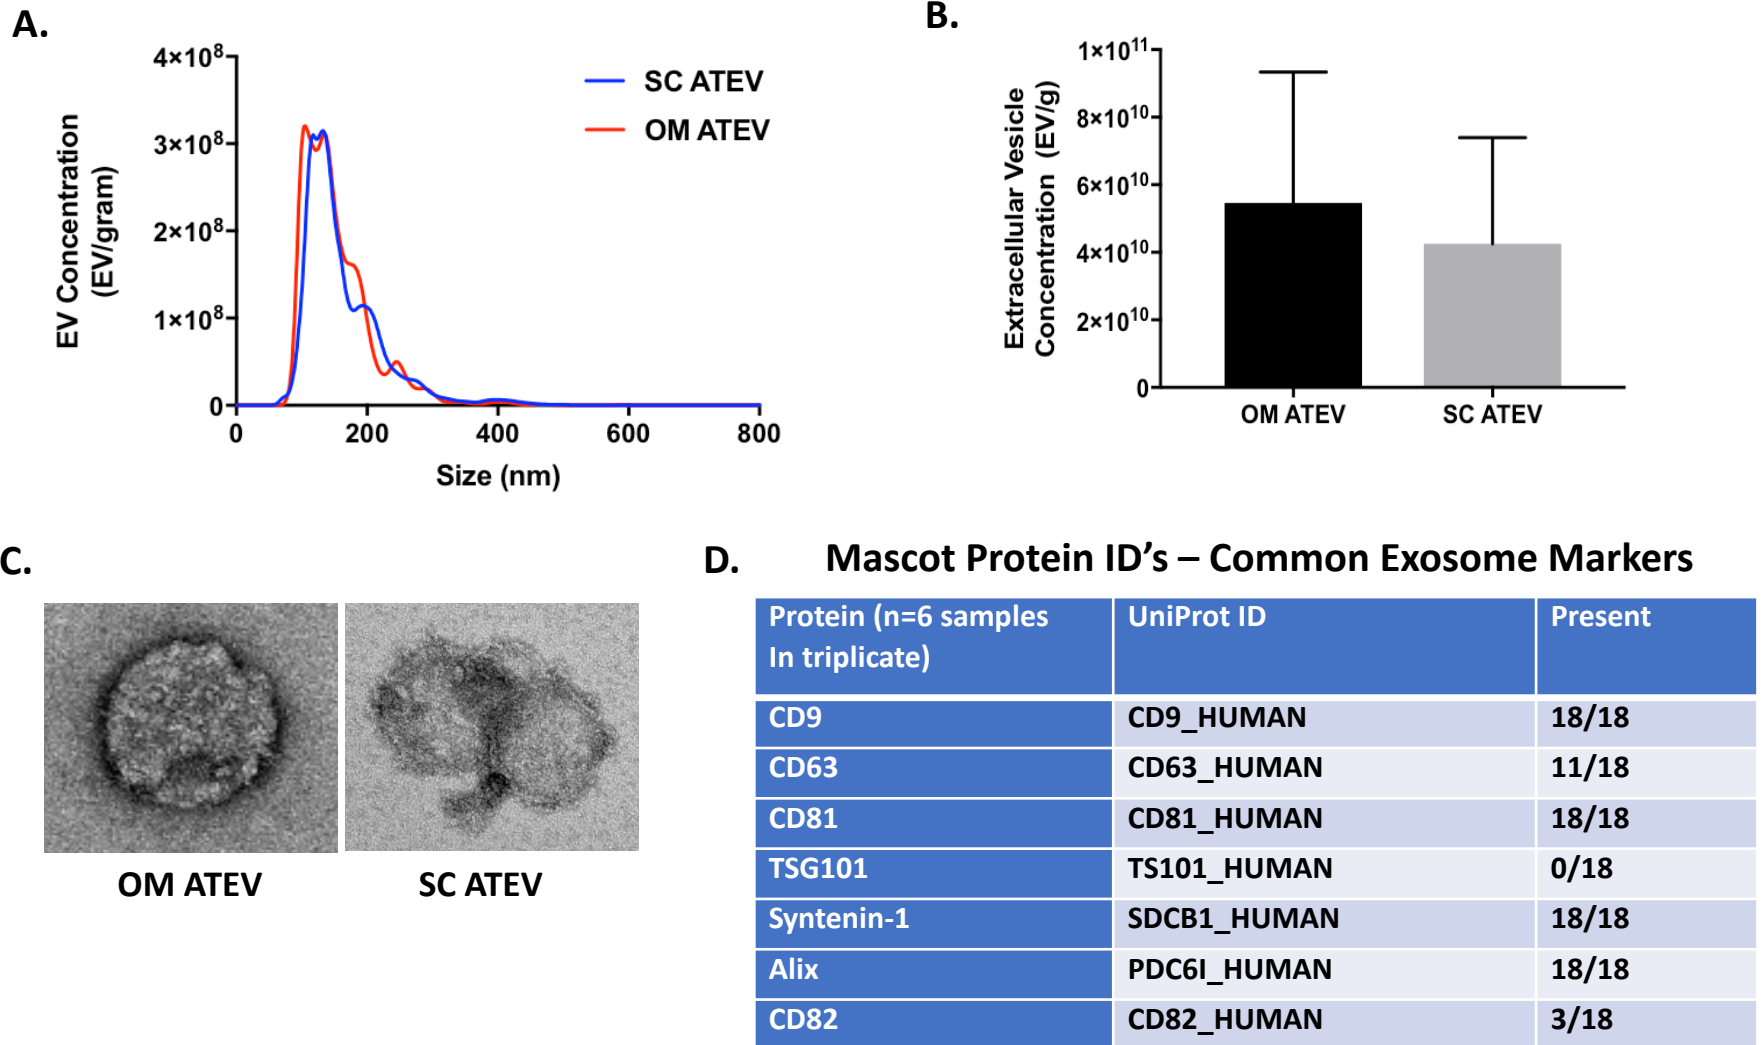

### Supplemental Figure S3: Characterization of EV isolated from omental and subcutaneous adipose tissue explants.

**A:** Nanoparticle size distribution and concentration of extracellular vesicles (EV) isolated from omental (OM) and subcutaneous (SC) adipose tissue. **B:** Nanosight analysis showed no significant difference in EV concentration for OM vs SC ATEV. Particle number was normalized to fat explant wet weight **C:** Representative micrographs of negative staining electron microscopy of ATEV from OM and SC adipose tissue **D:** EV markers were characterized via LC-MS/MS mass spectrometry for both OM and SC ATEV.
